# Supplementary material for: Facile synthesis of multibranched gold nanostars with precisely tunable sizes for surface-enhanced Raman scattering
Source: Royal Society of Chemistry journal article supplement (doi:10.1039/d3tc01796f), 2023-01-01
Supplement: d3tc01796f1.pdf [file d3tc01796f1.pdf]

## **Facile Synthesis of Multibranching Gold Nanostars with Precisely Tunable Sizes for Surface-Enhanced Raman Scattering**

*Cuixia Bi,<sup>\*a</sup> Zhixiu Wang,<sup>b</sup> Hongyan Zhao<sup>a</sup> and Guangqiang Liu<sup>\*a</sup>*

<sup>a</sup>School of Physics and Physical Engineering, Qufu Normal University, Qufu, 273165, P. R. China

<sup>b</sup>Administrative Office of Laboratory and Equipment, Qufu Normal University, Qufu 273165, P. R. China

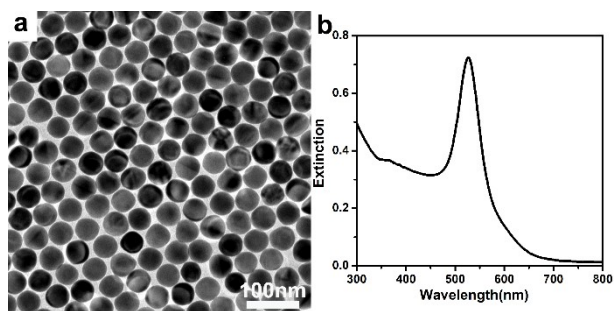

**Fig. S1** TEM image (a) and the corresponding UV-vis spectrum (b) of the as-prepared spherical Au NPs.

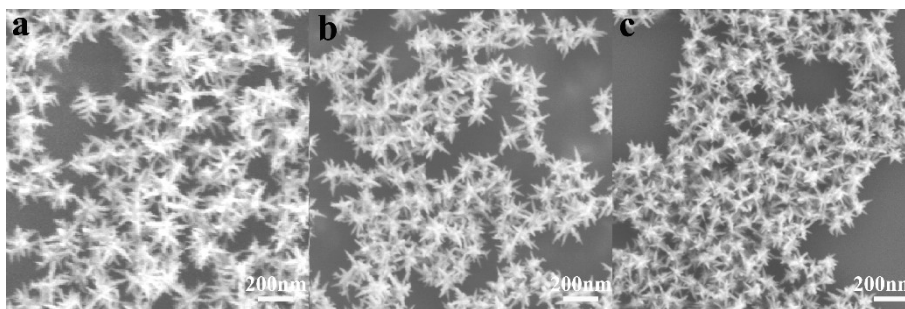

**Fig. S2** SEM images (a to c) of Au nanostars synthesized at different volume of 25 nm Au nanosphere solutions: 15 (a), 50 (b), and 100  $\mu\text{L}$  (c). The concentrations of CTAC,  $\text{HAuCl}_4$ , AA and cysteine in the growth solution are 15 mM and 0.18 mM, 4.5 mM, and 0.9  $\mu\text{M}$ , respectively.

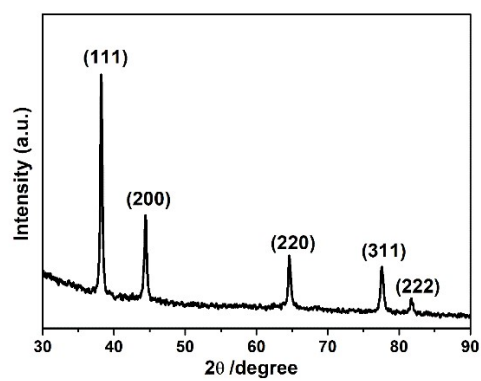

**Fig. S3** XRD spectrum of the Au nanostars.

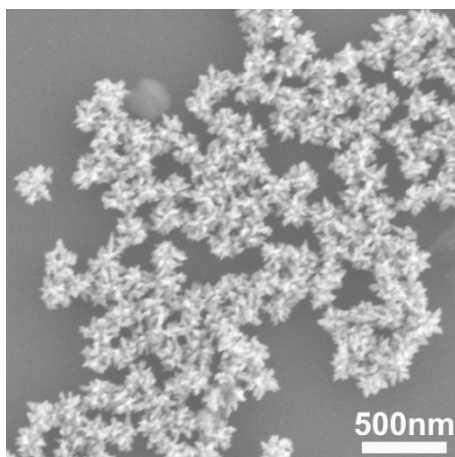

**Fig. S4** SEM images of flower-like Au NPs prepared under the same reaction conditions except that CTAC was replaced by CTAB. The optimal concentrations of CTAB, cysteine,  $\text{HAuCl}_4$ , and AA in the growth solution are 15 mM, 0.9  $\mu\text{M}$ , 0.18 mM, and 4.5 mM, respectively. The volume of as-prepared seed solutions in the growth solution is 100  $\mu\text{L}$ .

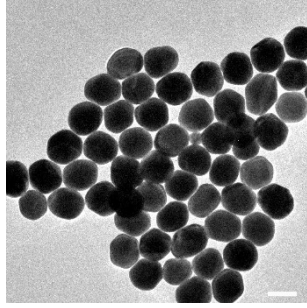

**Fig. S5** TEM image of the as-prepared 236 nm Au nanospheres. The scale bar is 200 nm.

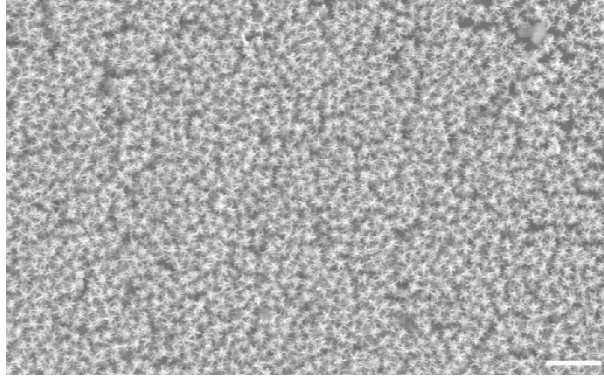

**Fig. S6** SEM image of the as-prepared Au nanostars substrate. The scale bar is 1  $\mu\text{M}$ .
